# Supplementary material for: Changes of quantitative CT-based airway wall dimensions in patients with COVID-19 during early recovery
Source: PubMed Central journal article supplement — J Thorac Dis. 2021 Mar;13(3):1517–30. doi: 10.21037/jtd-20-2790 (PMC8024853; doi:10.21037/jtd-20-2790), 2021-03
Supplement: jtd-13-03-1517-dss.pdf [file jtd-13-03-1517-dss.pdf]

## Data Sharing Statement

|                     |                                                                                                                                                     |                                                                                                                                                                                           |
|---------------------|-----------------------------------------------------------------------------------------------------------------------------------------------------|-------------------------------------------------------------------------------------------------------------------------------------------------------------------------------------------|
| <b>Article Info</b> | <a href="http://dx.doi.org/10.21037/jtd-20-2790">http://dx.doi.org/10.21037/jtd-20-2790</a>                                                         |                                                                                                                                                                                           |
| <b>Item</b>         | <b>Question</b>                                                                                                                                     | <b>Authors' Response<br/>(place “-” if not applicable)</b>                                                                                                                                |
| 1                   | Would you like to share data collected for your study to others?                                                                                    | Yes                                                                                                                                                                                       |
| 2                   | If not, would you like to share the reason for your decision?                                                                                       | -                                                                                                                                                                                         |
| 3                   | What data in particular will be shared?                                                                                                             | The quantitative airway dimensions of patients with COVID-19 will be shared, including the wall area percentage (WA%) and inner area, which has seldom been provided in previous studies. |
| 4                   | Any other documents will be shared? Such as study protocol, statistical analysis plan, informed consent form, clinical study report, analytic code. | Statistical analysis plan and clinical study report will be shared if requested. Written informed consent for data collection was waived for all participants.                            |
| 5                   | When will data availability begin?                                                                                                                  | From the publication date.                                                                                                                                                                |
| 6                   | When will data availability end?                                                                                                                    | Two years within the publication date, since the SARS-CoV-2 has mutated and could cause different manifestations regarding the airway dimensions.                                         |
| 7                   | To whom will you share the data?                                                                                                                    | Physician or pulmonologists who are interested in the airway dimension changes of patients with COVID-19.                                                                                 |
| 8                   | For what type of analysis or purpose?                                                                                                               | For pool analysis to further investigate the changes of airway dimensions.                                                                                                                |
| 9                   | How or where can the data/documents be obtained?                                                                                                    | Emails could be sent to the address below to obtain the shared data:<br>xujiaxuan@stu.gzhmu.edu.com                                                                                       |
| 10                  | Any other restrictions?                                                                                                                             | We may balance the potential benefits and risks for each request and then provide the data that could be shared.                                                                          |
